# Supplementary material for: 2D and 3D bimetallic oxalate-based ferromagnets prepared by insertion of MnIII-salen type complexes
Source: Royal Society of Chemistry journal article supplement (doi:10.1039/c3dt32996h), 2013-01-01
Supplement: c3dt32996h.pdf [file c3dt32996h.pdf]

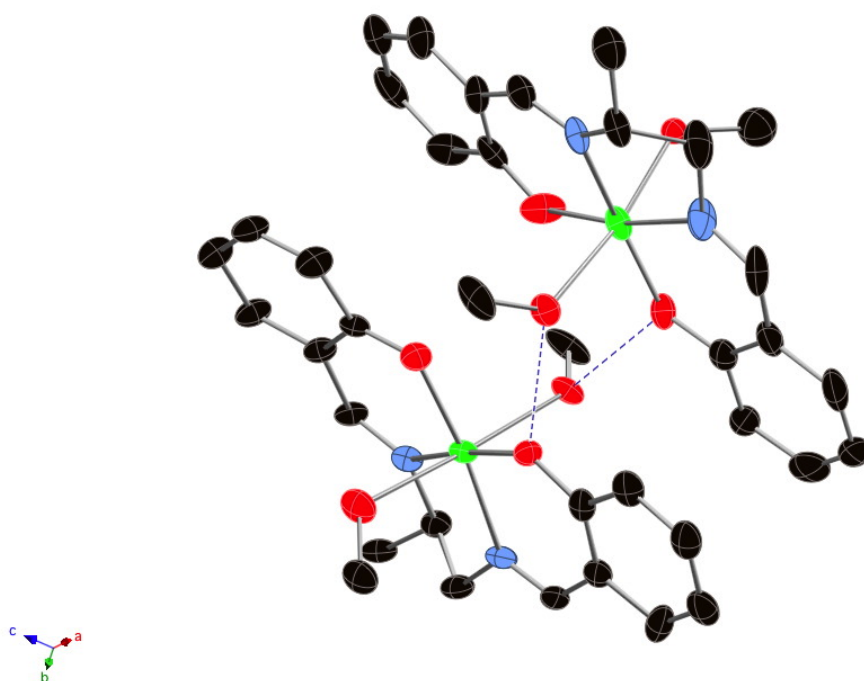

**Fig. SI1** Dimer of neighbouring  $[\text{Mn}((R)\text{-salmen})(\text{CH}_3\text{OH})_2]^+$  complexes linked through hydrogen-bonds in the structure of **(R)-2**. Hydrogen-bonds are blue-dashed lines. (Mn (green) C (black), N (blue), O (red)).

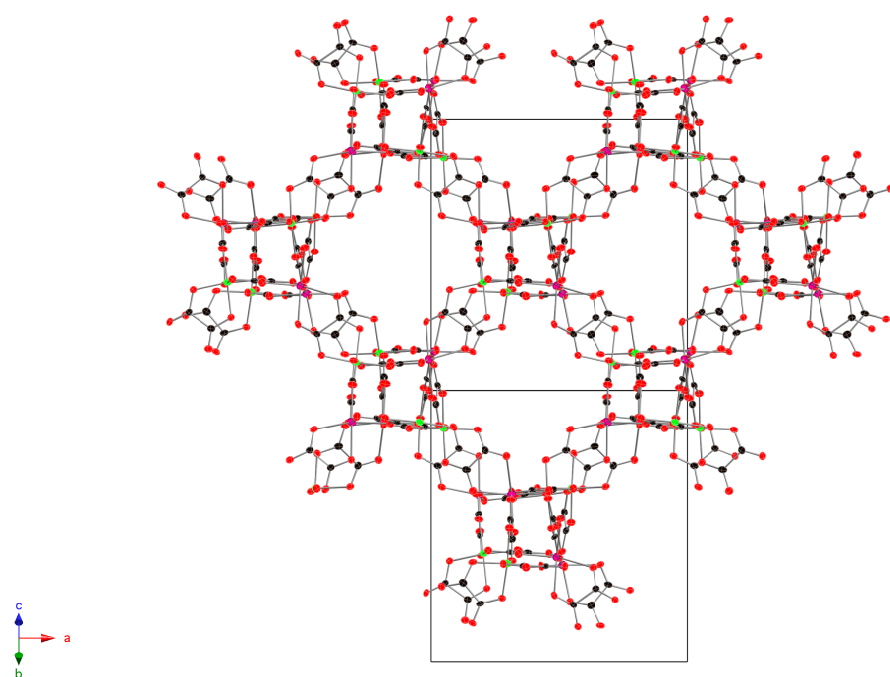

**Fig. S12** Projection of the oxalate network of **3** in the 011 plane. (Cr (pink), Mn (green)  
C (black), N (blue), O (red)).

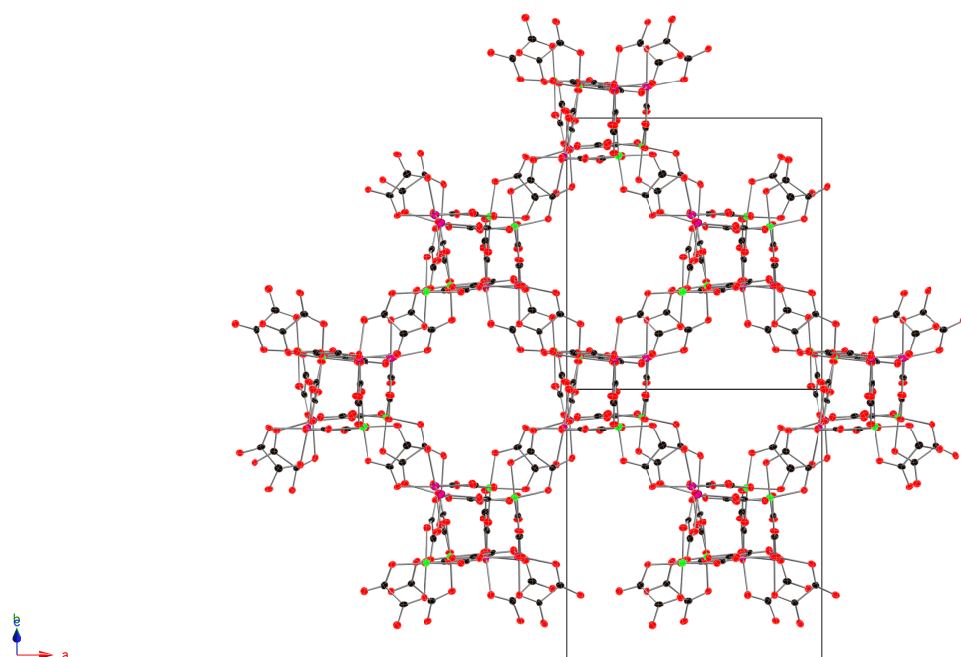

**Fig. SI3** Projection of the oxalate network of **3** in the 01-1 plane. (Cr (pink), Mn (green) C (black), N (blue), O (red)).

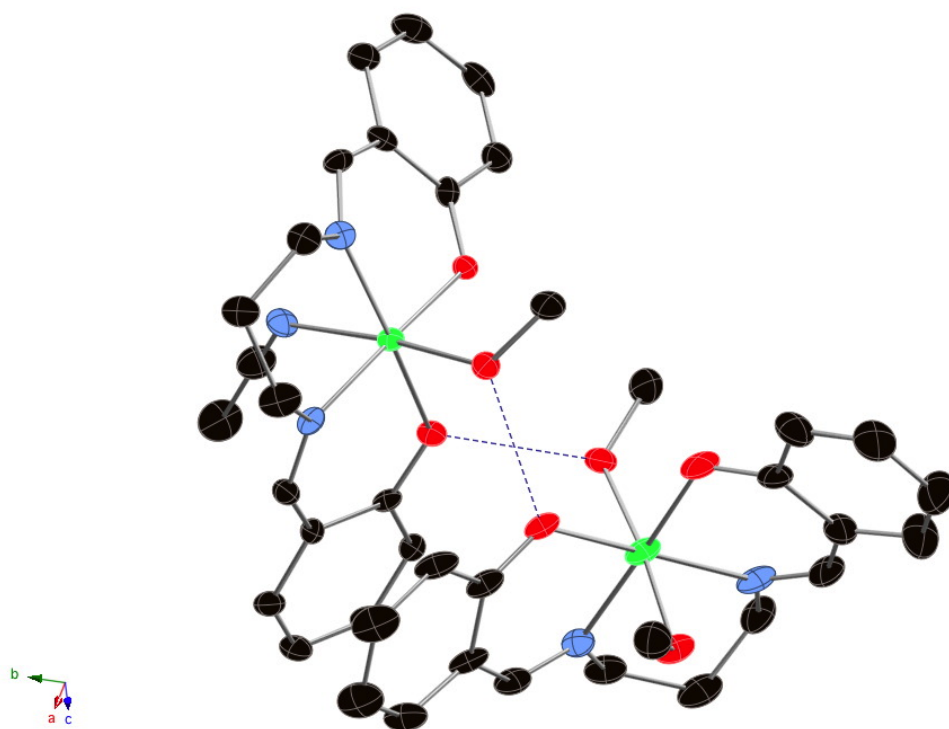

**Fig. SI4** Dimer of  $[\text{Mn}(\text{salpn})(\text{CH}_3\text{OH})_2]^+$  and  $[\text{Mn}(\text{salpn})(\text{CH}_3\text{CN})(\text{CH}_3\text{OH})]^+$  molecules linked through two hydrogen bonds. Hydrogen-bonds are blue-dashed lines. (Mn (green) C (black), N (blue), O (red)).

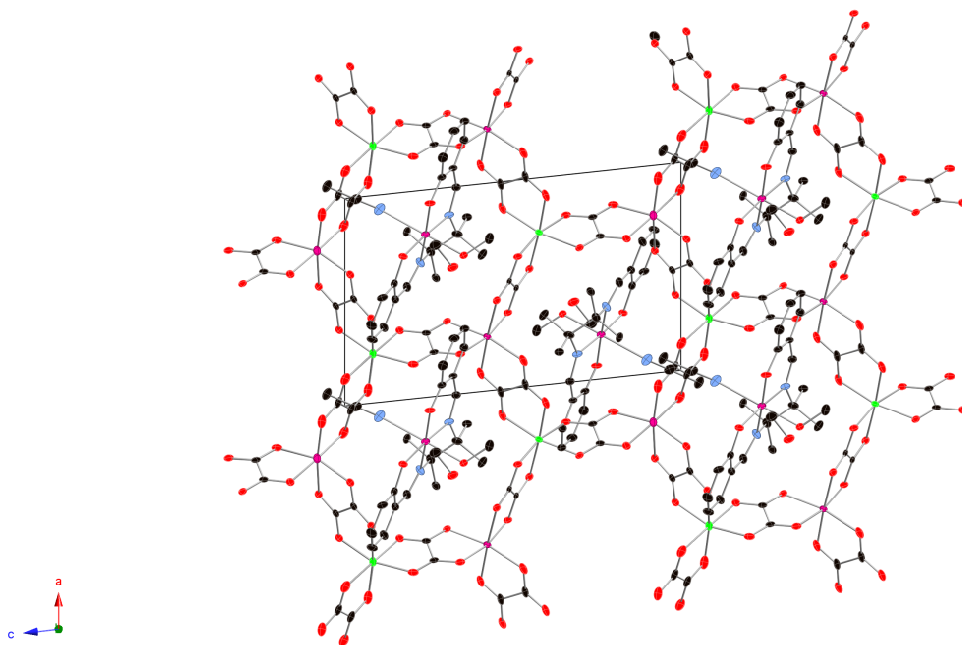

**Fig. SI5** Projection of **4** in the *ac* plane. (Cr (pink), Mn (green) C (black), N (blue), O (red)). Hydrogen atoms have been omitted for clarity.

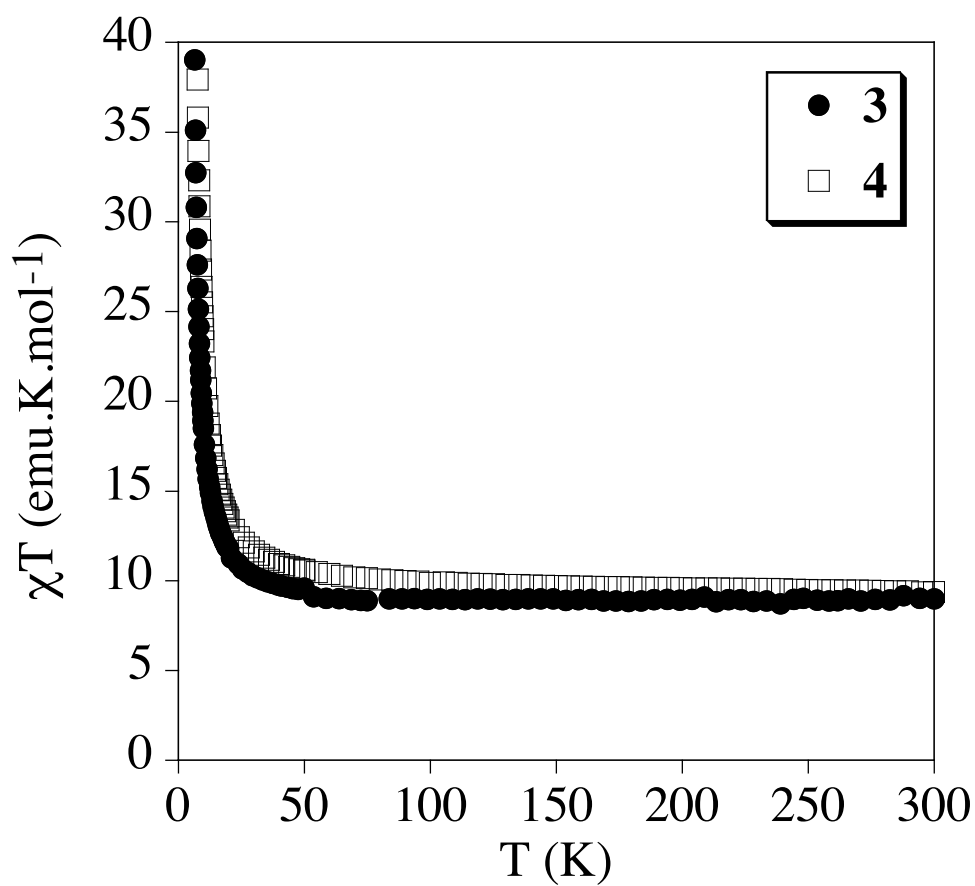

**Fig. SI6** Temperature dependence of the product of the molar magnetic susceptibility with temperature ( $\chi T$ ) at 0.1 T for compounds **3** (full circles) and **4** (empty circles).

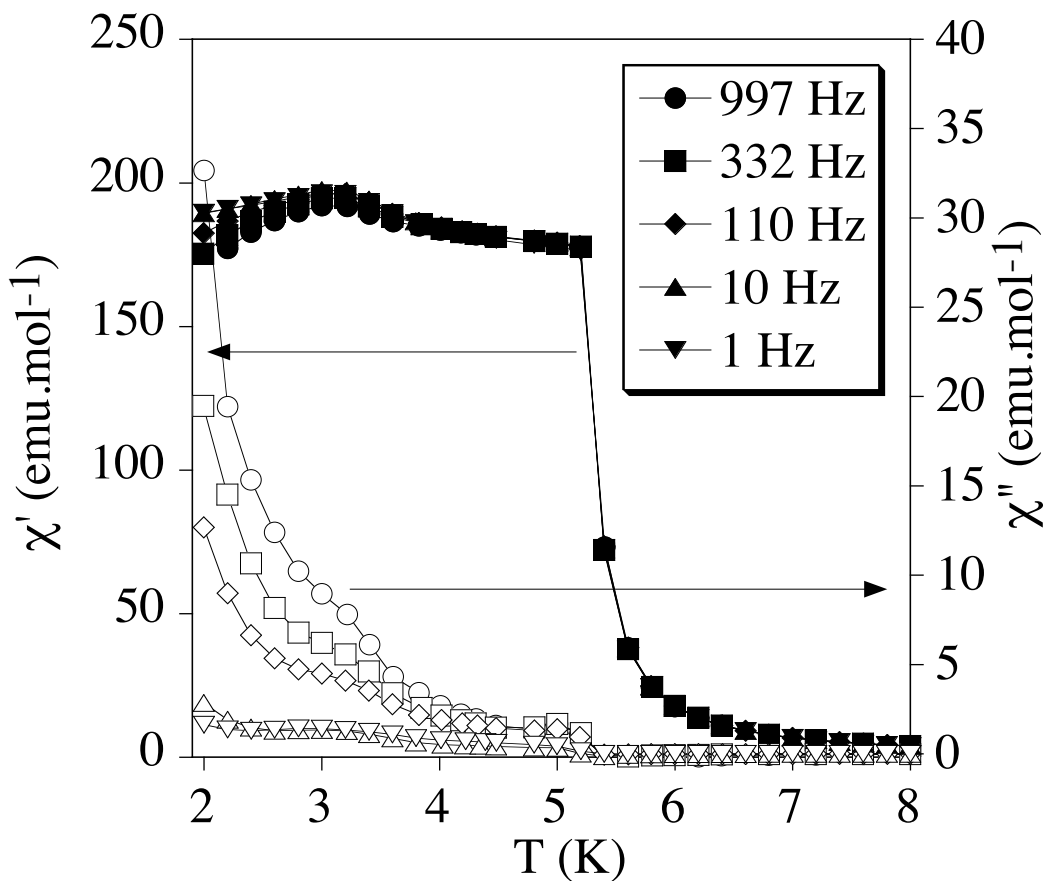

**Fig. SI7** Temperature dependence of the in-phase AC susceptibility ( $\chi'$ ) (filled symbols) and the out-of-phase AC susceptibility ( $\chi''$ ) (empty symbols) for **(R)-2**.

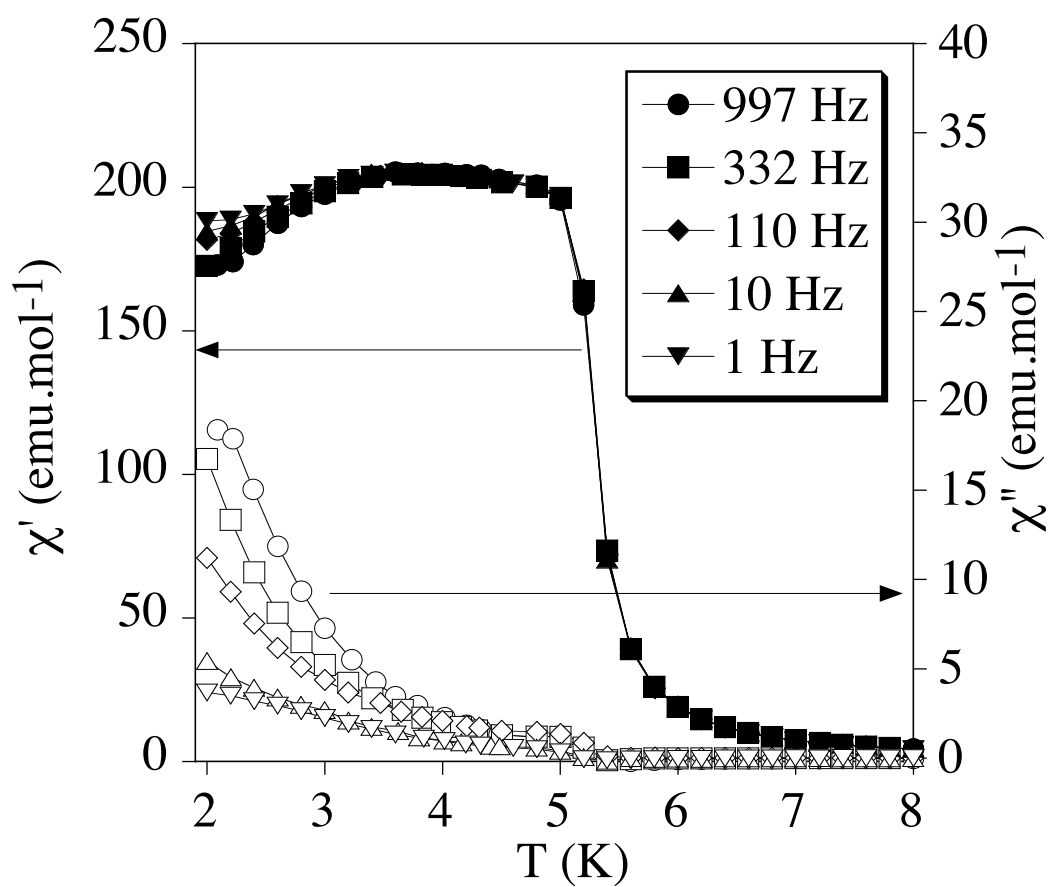

**Fig. SI8** Temperature dependence of the in-phase AC susceptibility ( $\chi'$ ) (filled symbols) and the out-of-phase AC susceptibility ( $\chi''$ ) (empty symbols) for (S)-2.



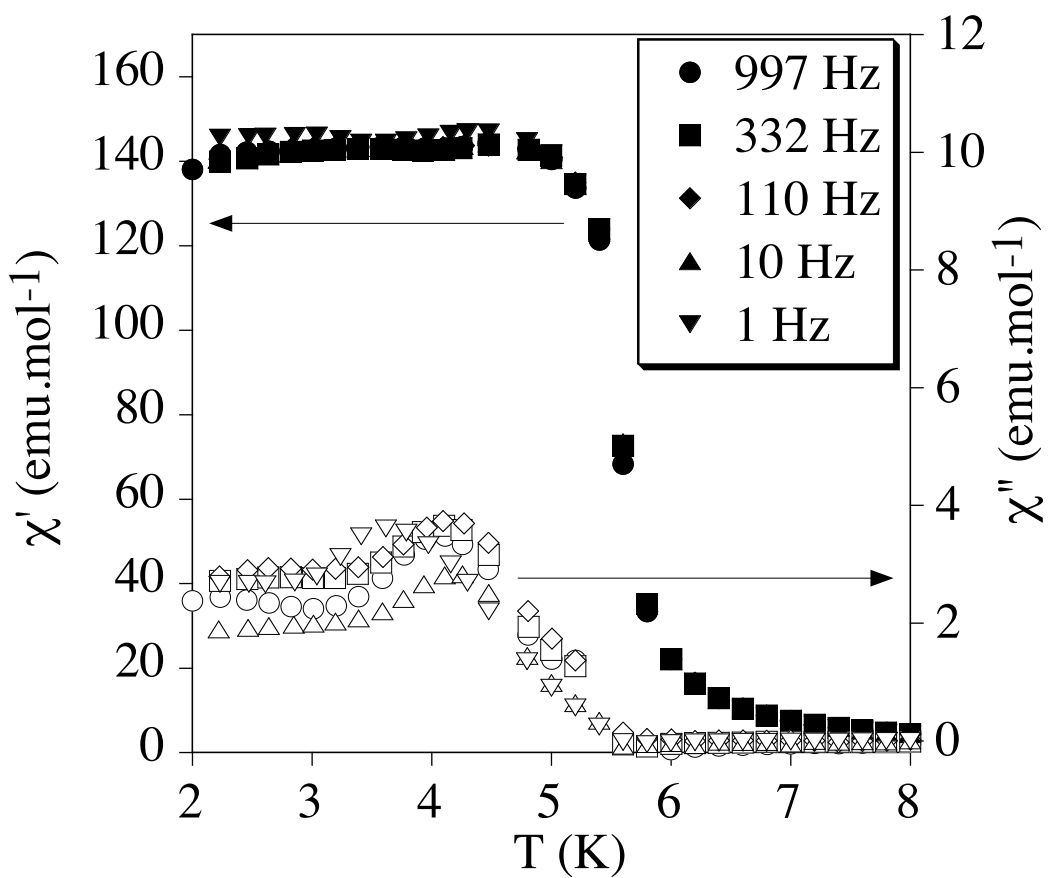

**Fig. SI9** Temperature dependence of the in-phase AC susceptibility ( $\chi'$ ) (filled symbols) and the out-of-phase AC susceptibility ( $\chi''$ ) (empty symbols) for 3.

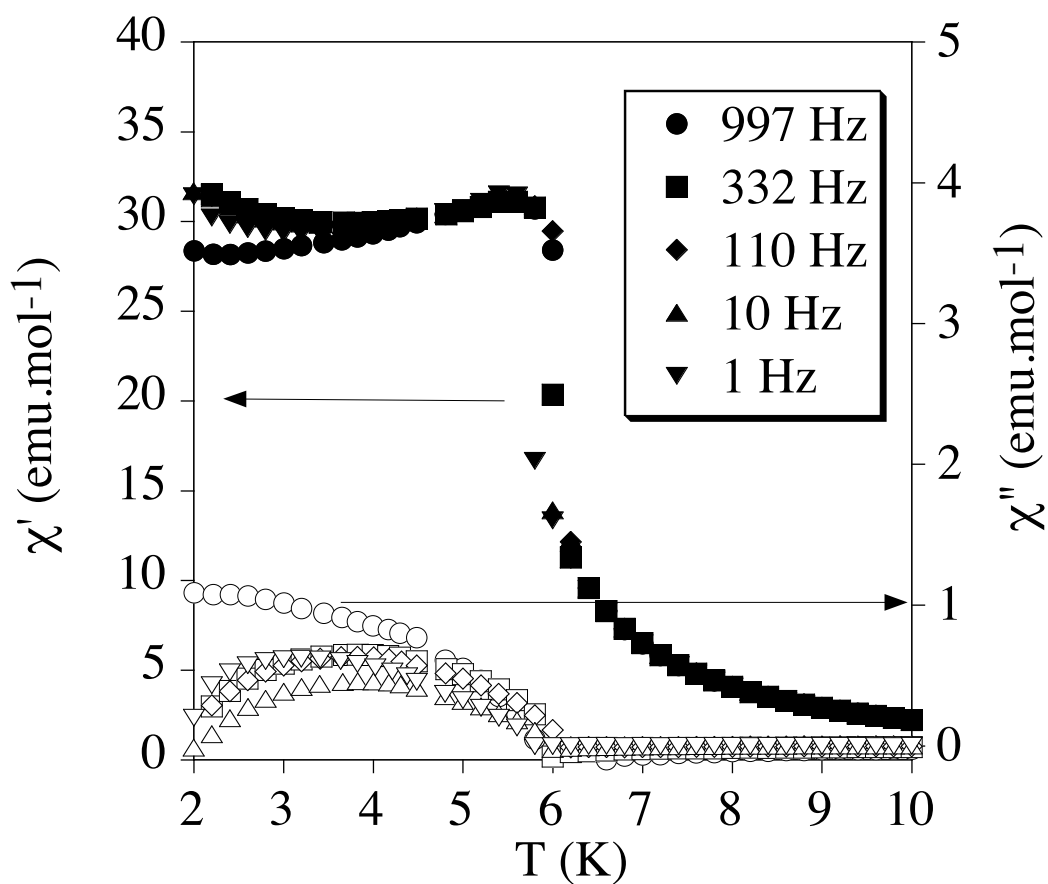

**Fig. SI10** Temperature dependence of the in-phase AC susceptibility ( $\chi'$ ) (filled symbols) and the out-of-phase AC susceptibility ( $\chi''$ ) (empty symbols) for 4.

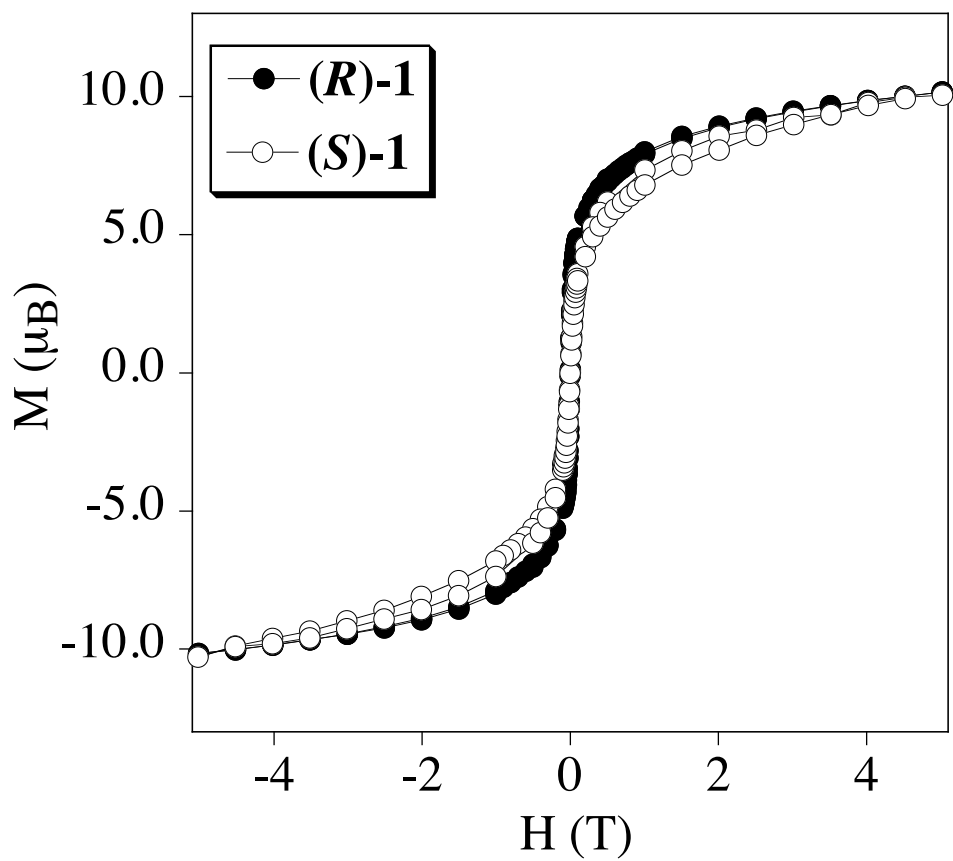

**Fig. SI11** Field dependence of the magnetization (M) for compounds **(R)-1** (full circles) and **(S)-1** (empty circles).

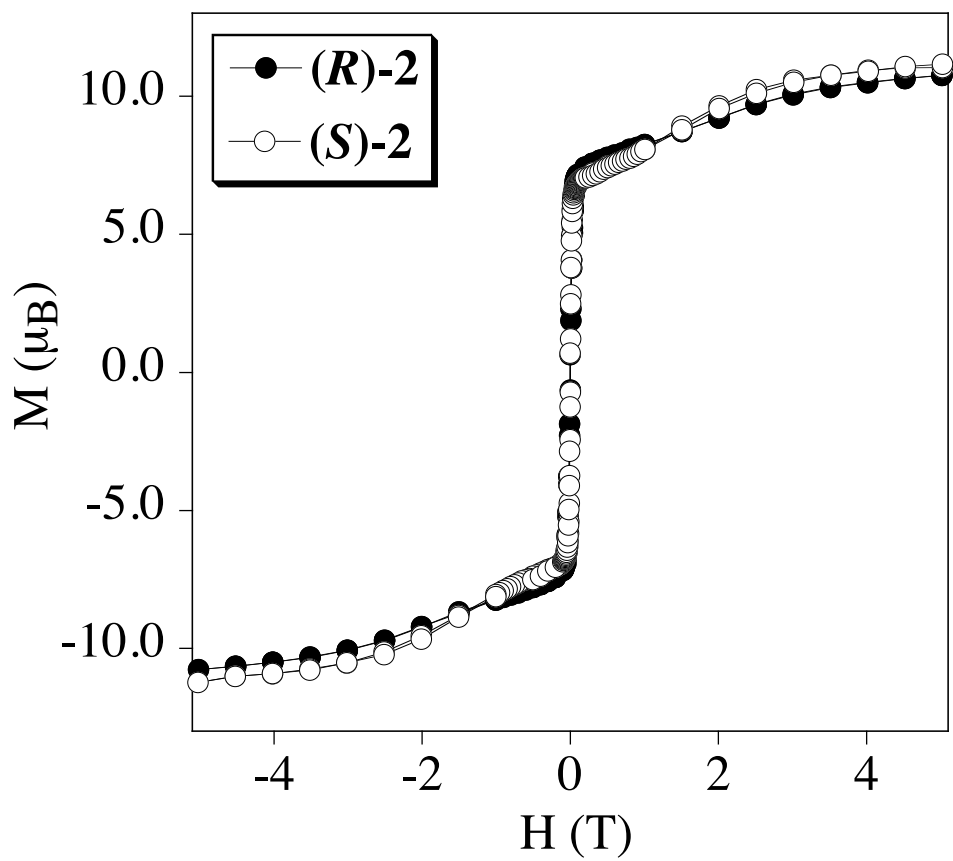

**Fig. SI12** Field dependence of the magnetization (M) for compounds **(R)-2** (full circles) and **(S)-2** (empty circles).

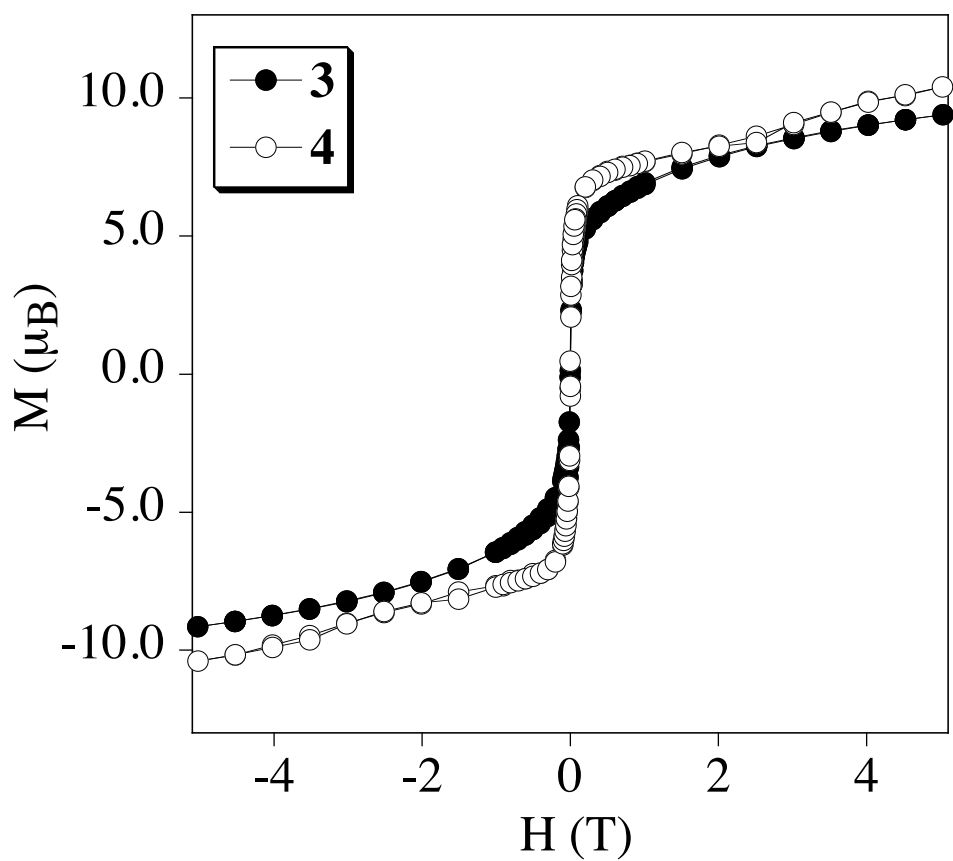

**Fig. SI13** Field dependence of the magnetization (M) for compounds **3** (full circles) and **4** (empty circles).
